# Supplementary material for: Rapid Production and Genetic Stability of Human Mesenchymal Progenitor Cells Derived from Human Somatic Cell Nuclear Transfer-Derived Pluripotent Stem Cells
Source: MDPI journal article supplement (doi:10.3390/ijms22179238), 2021-08-26
Supplement: s1 [file s1]

# **Rapid production and genetic stability of human mesenchymal progenitor cells derived from human somatic cell nuclear transfer-derived pluripotent stem cells**

**Soo Kyung Jung <sup>1,†</sup>, Jeoung Eun Lee <sup>1,†</sup>, Chang Woo Lee <sup>1</sup>, Sung Han Shim <sup>2</sup> and Dong Ryul Lee <sup>1,2,\*</sup>**

<sup>1</sup> CHA Advanced Research Institute, CHA University Bundang Medical Center, Seongnam, Gyeonggi 13488, Korea; bellotsk@hanmail.net (S.K.J.); jel43@chamc.co.kr (J.E.L.); lcwckddn@chamc.co.kr (C.W.L.)

<sup>2</sup> Department of Biomedical Science, CHA University, Seongnam, Gyeonggi 13488, Korea; shshim@cha.ac.kr

\* Correspondence: drleedr@cha.ac.kr

† These authors contributed equally to this work.

# CHA-hESC-15-Direct-MPCs

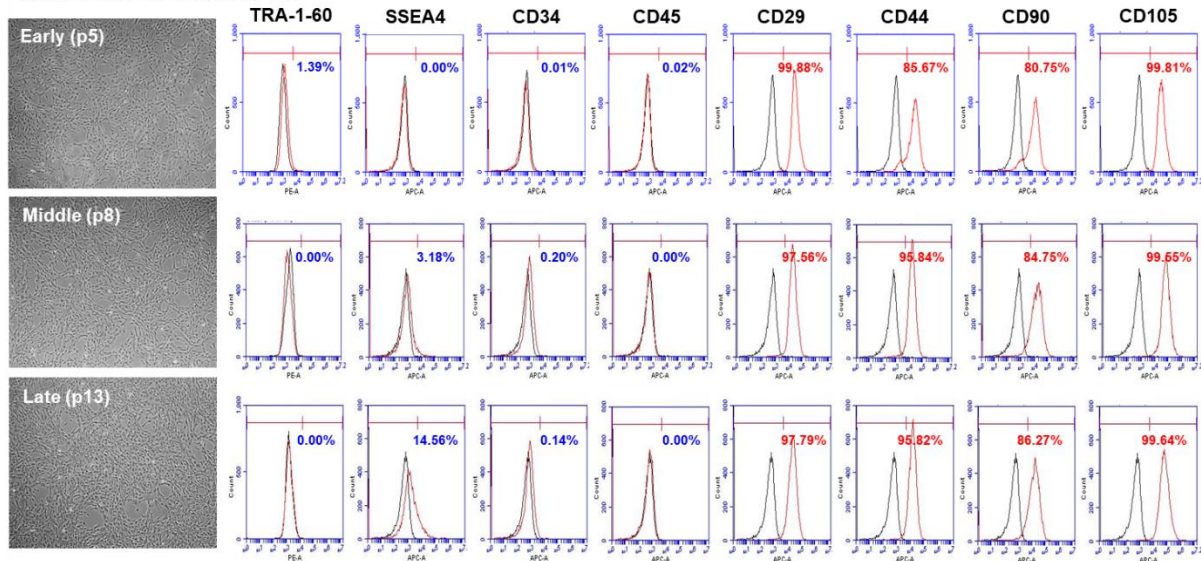

**Supplementary figure S1.** Representative morphology and surface antigen expression profiles of CHA-hESC-15-Direct-MPCs during subculture. Over time, the morphologies of subcultured hPSC-Direct-MPCs were similar regardless of the number of passages. Bars, 100  $\mu$ m (magnification, 40 $\times$ ). Additionally, FACS analysis showed that the markers for MPCs (CD29, CD44, CD90 and CD105) were highly expressed, but neither the pluripotent stem cell markers (TRA-1-60 and SSEA4) nor the hematopoietic markers (CD34 and CD45) were highly expressed, regardless of the number of passages.

# CHA-SCNT17-hPSC-Direct-MPCs

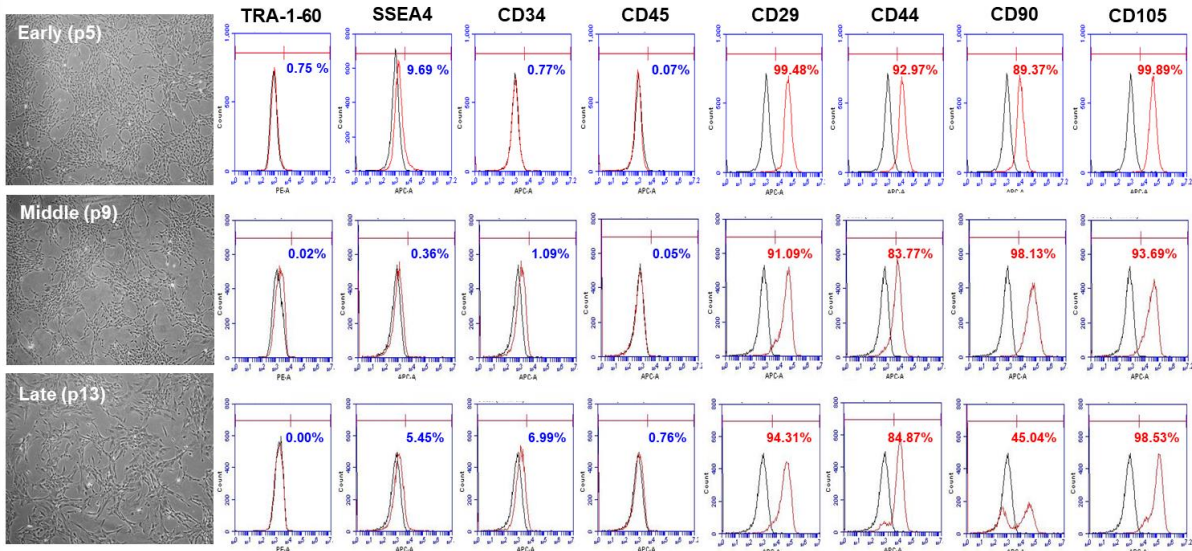

**Supplementary figure S2.** Representative morphology and surface antigen expression profiles of CHA-SCNT-hPSC-17-Direct-MPCs during subculture. Over time, the morphologies of subcultured hPSC-Direct-MPCs were similar regardless of the number of passages. Bars, 100  $\mu$ m (magnification, 40 $\times$ ). Additionally, FACS analysis showed that the markers for MPCs (CD29, CD44, CD90 and CD105) were highly expressed, but neither the pluripotent stem cell markers (TRA-1-60 and SSEA4) nor the hematopoietic markers (CD34 and CD45) were highly expressed, regardless of the number of passages.

### CHA-SCNT-hPSC-18-Direct-MPCs

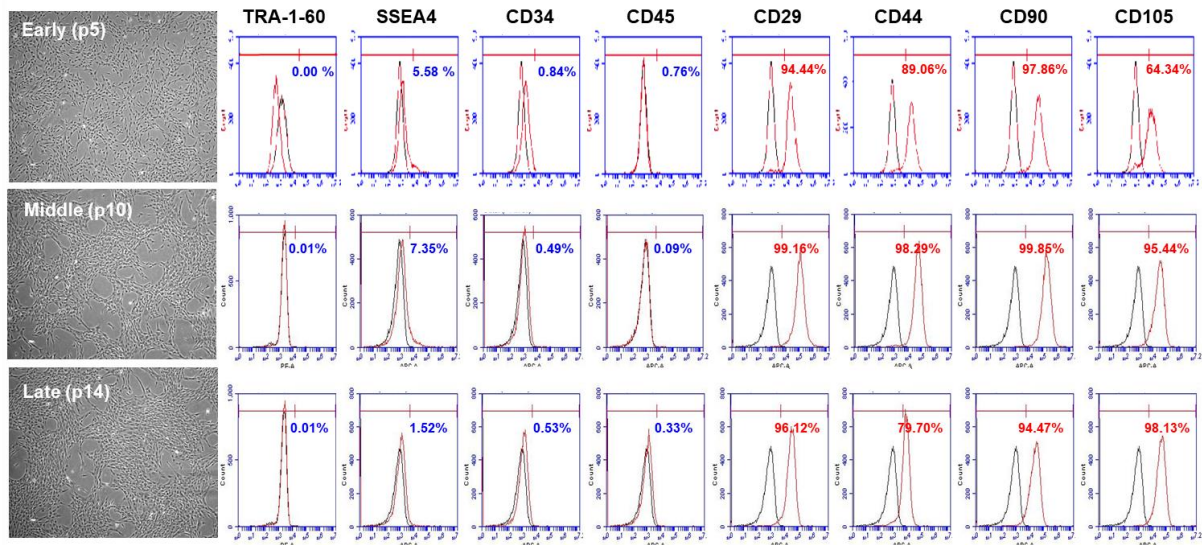

**Supplementary figure S3.** Representative morphology and surface antigen expression profiles of CHA-SCNT-hPSC-18-Direct-MPCs during subculture. Over time, the morphologies of subcultured hPSC-Direct-MPCs were similar regardless of the number of passages. Bars, 100  $\mu$ m (magnification, 40 $\times$ ). Also, FACS analysis showed that the markers for MPCs (CD29, CD44, CD90 and CD105) were highly expressed, but neither the pluripotent stem cell markers (TRA-1-60 and SSEA4) nor the hematopoietic markers (CD34 and CD45) were highly expressed, regardless of the number of passages.

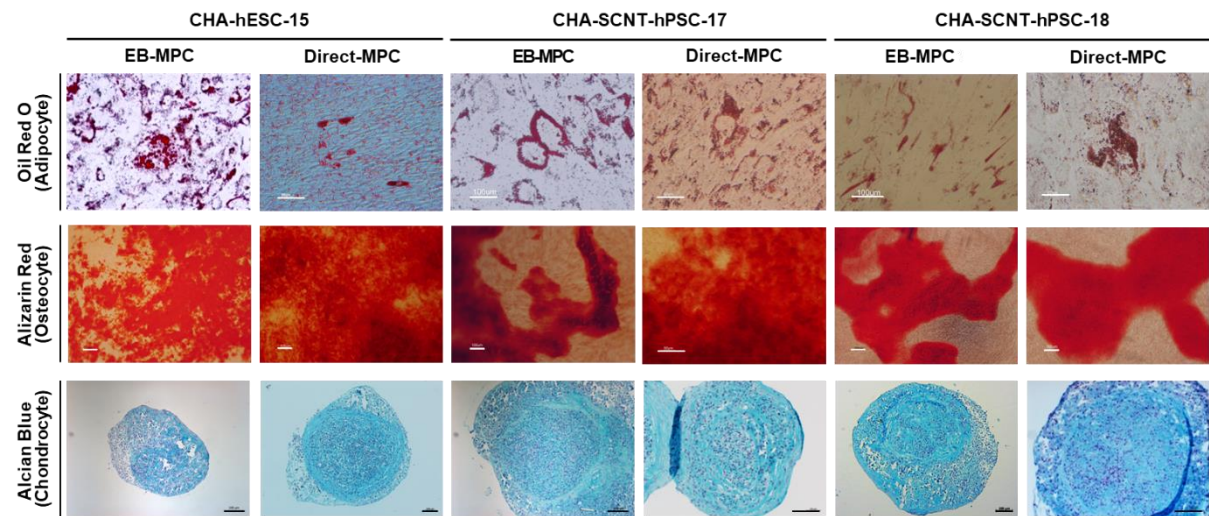

**Supplementary figure S4.** Differentiation ability of hPSC-derived MPCs (passages 5 to 7) into adipocytes, chondrocytes, and osteocytes. The lipid droplets in adipocytes were stained with Oil Red O. The calcium deposits at the intracellular region in osteocytes were stained with Alizarin Red. Cells that differentiated into chondrocytes were fixed and then embedded in paraffin. The sectioned samples were stained with Alcian Blue. Bar size, 100  $\mu$ m.



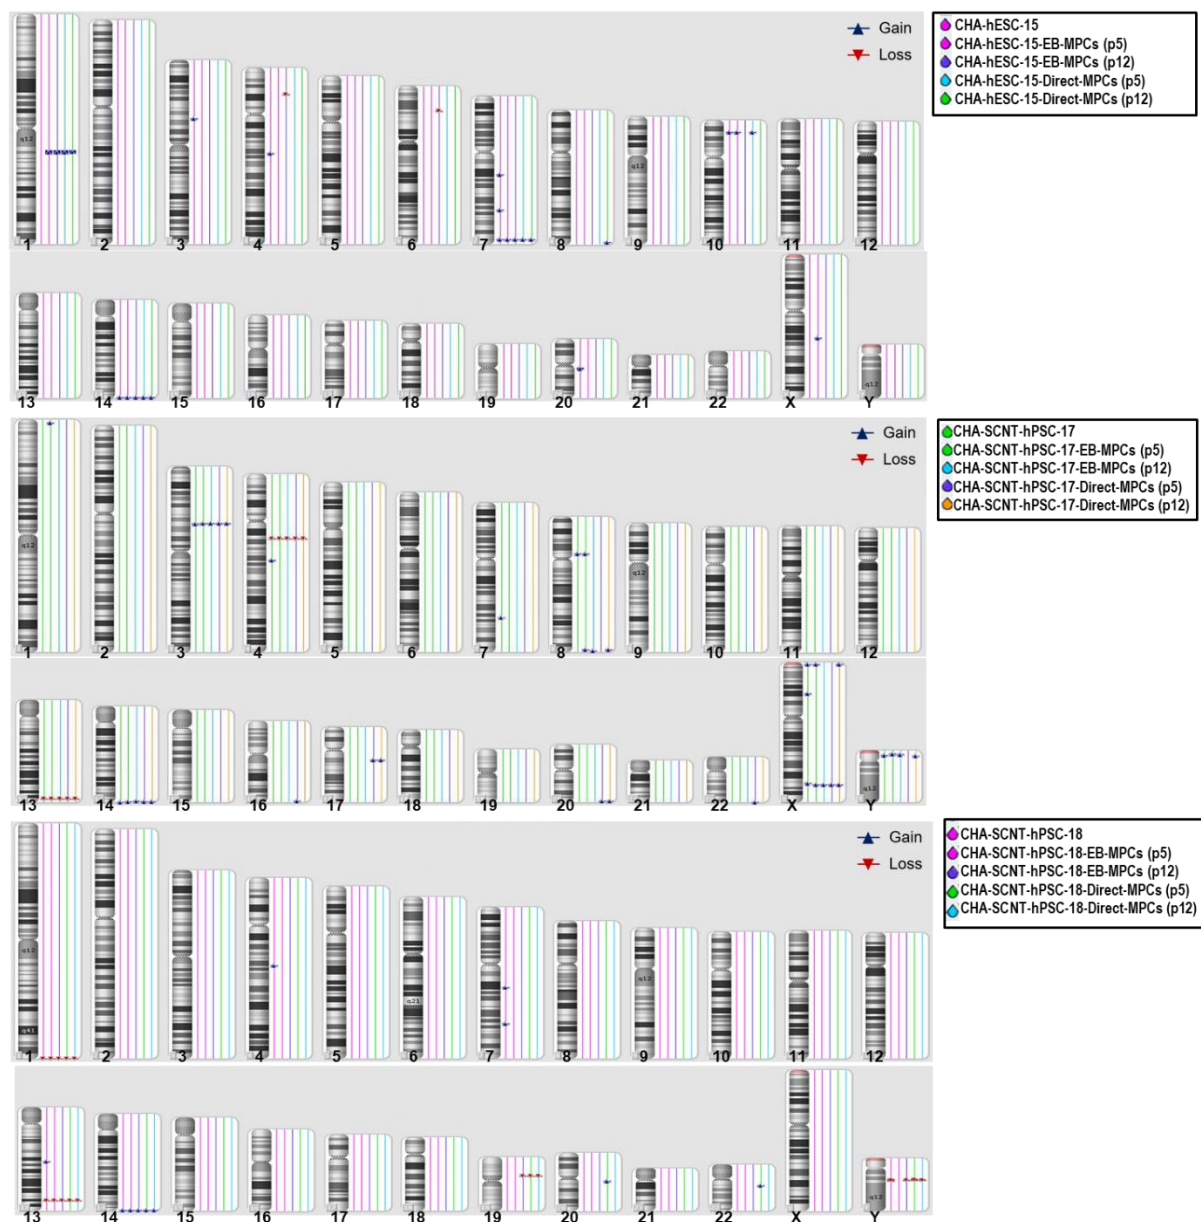

**Supplementary figure S5.** Ideogram illustrating the genome-wide distribution of DNA amplifications and deletions (copy number variation) on each chromosome of hPSC and hPSC-derived MPCs at early and late passages. Each line next to a chromosome represents one sample. Amplifications and deletions are mapped onto the chromosome. Each individual CNV is marked: blue triangles pointing upward indicate amplification, red triangles pointing downward indicate deletion. Variation size > 100 kbp.

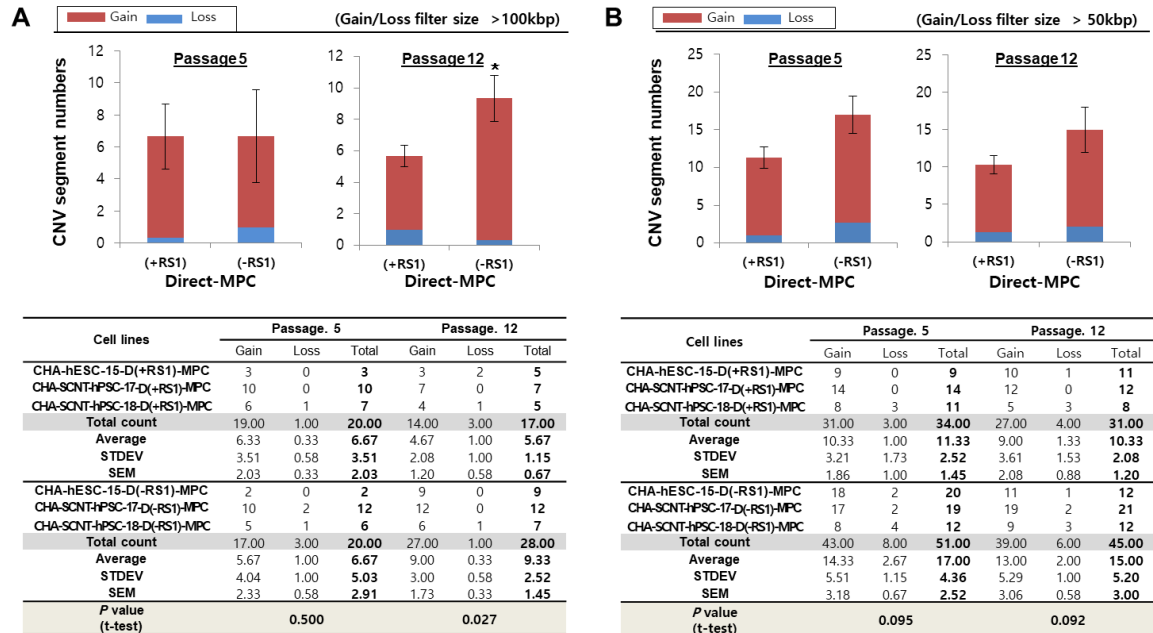

**Supplementary figure S6.** Array-based comparative genomic hybridization analysis of hPSC-derived Direct-MPCs after the addition of RS1. Human PSCs were used as the control cells in an analysis of array-CGH results for genomic variation. CNV results are presented as the means of MPCs derived from three cell lines: CHA-hESC-15, CHA-SCNT-hPSC-17, or CHA-SCNT-hPSC-18. The data are presented as the means  $\pm$  SE. \* $p < 0.05$ . (A) Variation size > 100 kbp and (B) variation size > 50 kbp.

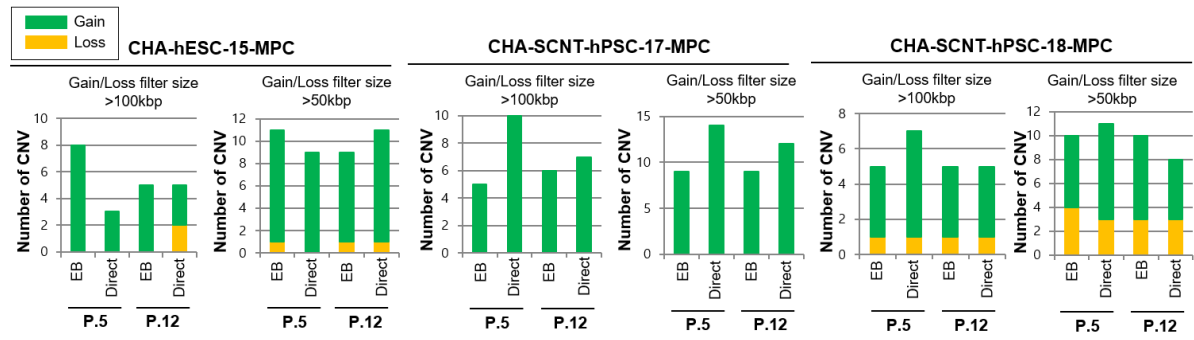

**Supplementary figure S7.** Copy number variation results for each hPSC-derived-MPC lines related to Figure 4.



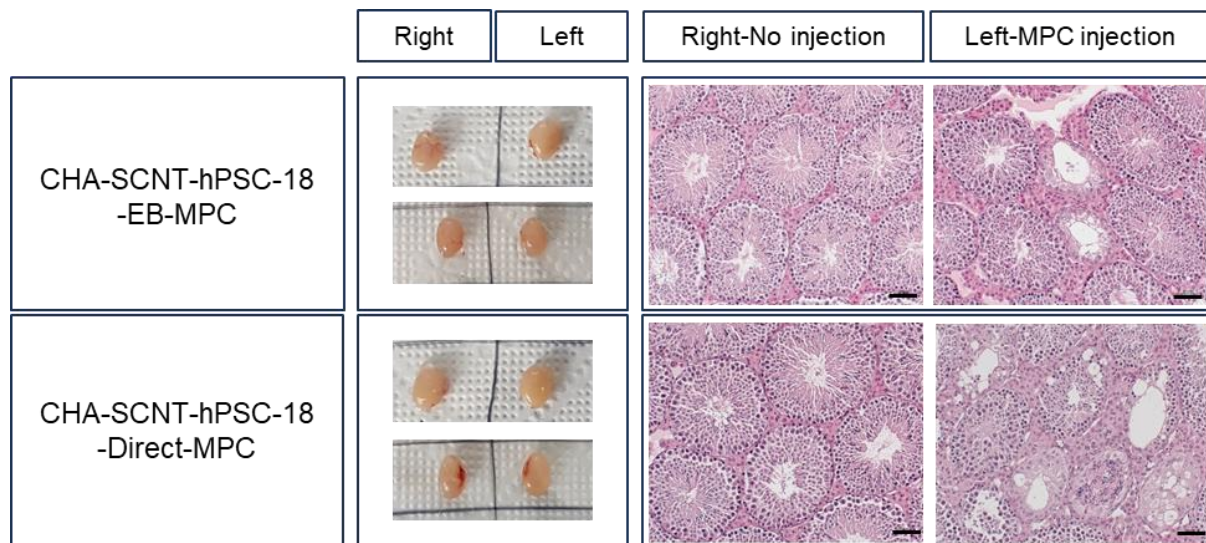

**Supplementary figure S8.** Nontumorigenic properties of CHA-SCNT-hPSC-18-derived MPCs. CHA-SCNT-hPSC-18-EB-MPCs and CHA-SCNT-hPSC-18-Direct-MPCs were transplanted into the left testis of immunodeficient mice. No teratomas in either the CHA-SCNT-hPSC-18-EB-MPC or CHA-SCNT-hPSC-18-Direct-MPC (p5~p6) injected mice were observed after 15 weeks. Bar size, 50  $\mu$ m.

**Supplementary Table S1.** CNV size and related genes in hPSC-derived EB-MPCs and Direct-MPCs (variation size >100 kbp)

|                                                      | Chr. | Start    | End      | Size(kb) | Genes in this region                                                                                                                                                                                                                         |
|------------------------------------------------------|------|----------|----------|----------|----------------------------------------------------------------------------------------------------------------------------------------------------------------------------------------------------------------------------------------------|
| <b>CHA-hESC-15</b><br><b>EB vs. Direct-MPCs</b>      |      |          |          |          | None                                                                                                                                                                                                                                         |
|                                                      | 1    | 1220665  | 2820376  | 1599711  | SDF4, B3GALT6, FAM132A, SCNN1D, CPSF3L, CPTP, TAS1R3, DVL1, AURKAIP1, CCNL2, MRPL20, VWA1, ATAD3B, ATAD3A, TMEM240, MIB2, MMP23B, MMP23A, CDK11B, CDK11A, NADK, GNB1, CALML6, GABRD, PRKCZ, FAAP20, SKI, PEX10, PLCH2, PANK4, HES5, TNFRSF14 |
| <b>CHA-SCNT-hPSC-17</b><br><b>EB vs. Direct-MPCs</b> | 16   | 88726738 | 88899909 | 173171   | PIEZO1, CDT1, APRT, GALNS, TRAPPC2L, CBFA2T3                                                                                                                                                                                                 |
|                                                      | 17   | 36098850 | 36466620 | 367770   | CCL4, TBC1D3B, CCL3L3, CCL3L1, CCL4L1, CCL4L2                                                                                                                                                                                                |
|                                                      | 20   | 62315179 | 62663307 | 348128   | LAMA5, RPS21, GATA5, MIR1-1, MIR133A2, SLCO4A1                                                                                                                                                                                               |
|                                                      | 22   | 50148437 | 50291244 | 142807   | MOV10L1, PANX2, TUBGCP6, HDAC10, MAPK12, MAPK11, PLXNB2                                                                                                                                                                                      |
| <b>CHA-SCNT-hPSC-18</b><br><b>EB vs. Direct-MPCs</b> | 20   | 31245731 | 32159581 | 913850   | DEFB118, DEFB119, DEFB121, DEFB122, DEFB123, REM1, HM13, ID1, COX4I2, BCL2L1, ABALON, TPX2, MYLK2, FOXS1, DUSP15, PDRG1, HCK                                                                                                                 |
|                                                      | 22   | 22655866 | 22916863 | 260997   | MIR650                                                                                                                                                                                                                                       |
